# Supplementary material
Source: PubMed Central journal article supplement (PMC5404536)
Supplement: AAC.00014-17_zac005176166s1.pdf [file AAC.00014-17_zac005176166s1.pdf]

Table S1. Characteristics of the assembled reads of the *E. coli* ErtS genome.

| Consensus Calling Results |                  |              |                       |          |
|---------------------------|------------------|--------------|-----------------------|----------|
| Reference                 | Reference Length | Bases Called | Consensus Concordance | Coverage |
| unitig_0                  | 5,081,574        | 100.0%       | 99.9826%              | 70.44    |
| unitig_3                  | 135,144          | 100.0%       | 99.9697%              | 55.16    |
| unitig_4                  | 88,450           | 100.0%       | 99.9536%              | 82.37    |
| unitig_5                  | 54,848           | 99.99%       | 99.8778%              | 32.66    |
| unitig_1                  | 19,655           | 99.9%        | 99.9745%              | 21.45    |
| unitig_2                  | 16,187           | 99.95%       | 99.9320%              | 22.71    |

This table presents the characteristics of the assembled reads of the *E. coli* ErtS genome, which were obtained using the PacBio RS II platform. The other features of the assembly were : Polished Contigs 6 ; Max Contig Length 5,082,442 ; N50 Contig Length 5,082,442 ; Sum of Contig Lengths 5,397,004.
